# Supplementary material for: Construction of Gene Modules and Analysis of Prognostic Biomarkers for Cervical Cancer by Weighted Gene Co-Expression Network Analysis
Source: Front Oncol. 2021 Mar 18;11:542063. doi: 10.3389/fonc.2021.542063 (PMC8016394; doi:10.3389/fonc.2021.542063)
Supplement: Supplementary file 3 [file Table_3.xlsx]

## Sheet: Supplementary Table3
Module	ID	Description	GeneRatio	BgRatio	pvalue	p.adjust	qvalue	geneID	Count
midnightblue	hsa04340	Hedgehog signaling pathway	4/39	47/7276	0.000106532	0.00852258	0.0082983	3549/6469/5727/2735	4
turquoise	hsa04668	TNF signaling pathway	34/971	108/7276	7.22042e-07	0.000217335	0.000181651	3551/1906/8517/11035/83737/3725/2921/148327/192111/5609/9020/5600/10454/355/9530/7186/2353/9021/4790/6364/3600/6347/1435/7188/90993/6376/207/6300/5296/8717/5601/8809/1385/8503	34
turquoise	hsa05165	Human papillomavirus infection	68/971	321/7276	4.82138e-05	0.00619392	0.00517695	7249/10312/3551/7059/5527/8517/27175/63923/5521/3455/3955/5519/3716/3912/5933/1741/4854/9759/3915/3445/148327/8324/6934/3454/5747/2475/10014/355/3911/1277/9641/7855/7450/1956/1739/55869/4790/84441/1101/3913/5829/10319/23462/3661/5529/1292/3655/1855/90993/2535/5986/1387/80326/3280/5894/207/578/5296/8717/6198/55012/7480/1282/3845/6009/1385/3675/8503	68
turquoise	hsa04211	Longevity regulating pathway	26/971	89/7276	6.17335e-05	0.00619392	0.00517695	3643/7249/109/8660/9470/148327/2475/57521/112/4790/10891/26060/90993/5562/27244/5565/207/83667/5296/6198/8408/84335/3845/6009/1385/8503	26
turquoise	hsa00514	Other types of O-glycan biosynthesis	10/971	22/7276	0.000241598	0.0117341	0.00980749	3955/10585/23509/727936/29954/8985/8704/283464/5986/8473	10
turquoise	hsa01522	Endocrine resistance	26/971	96/7276	0.000242525	0.0117341	0.00980749	109/1871/54567/25759/53358/3725/4854/5747/2475/5600/1956/2353/638/112/6667/10498/1870/5894/207/6300/5296/6198/5601/1565/3845/8503	26
turquoise	hsa04931	Insulin resistance	28/971	107/7276	0.000266883	0.0117341	0.00980749	3643/3551/8660/148327/9945/90673/2475/10062/200186/11000/9021/4790/5580/6196/10891/1374/90993/5562/5565/5792/207/8473/5296/6198/5601/22877/1385/8503	28
turquoise	hsa05167	Kaposi's sarcoma-associated herpesvirus infection	40/971	173/7276	0.000272886	0.0117341	0.00980749	3551/8517/59345/100507436/1871/3455/3725/3716/2921/3445/3454/9020/2475/5600/355/1234/9641/22863/23710/54205/7186/2353/4775/4790/3717/3661/1827/1870/1387/5894/207/6300/578/5296/8717/5601/3845/1385/8503/10681	40
turquoise	hsa05222	Small cell lung cancer	25/971	93/7276	0.000359522	0.013527	0.011306	3551/8517/1871/3912/3915/79444/5747/3911/54205/7186/4790/3913/10912/10319/3655/7188/1870/207/9618/578/5296/1282/51426/3675/8503	25
turquoise	hsa05231	Choline metabolism in cancer	26/971	99/7276	0.000411072	0.0137481	0.0114908	7249/56994/3725/2475/5578/1119/56261/1956/126969/2353/8605/6667/6584/6582/6581/23446/5894/207/8394/7454/5296/6198/5601/3845/6009/8503	26
turquoise	hsa05418	Fluid shear stress and atherosclerosis	33/971	139/7276	0.0005549	0.0167025	0.0139601	163688/3551/659/1906/8517/1843/3725/4688/5747/5609/5600/2947/2353/2953/5607/4790/6347/3162/4259/5562/2948/93/91860/51588/406902/207/6300/8878/5296/801/5601/4205/8503	33
turquoise	hsa04722	Neurotrophin signaling pathway	29/971	119/7276	0.00075215	0.0205816	0.0172023	163688/3551/4145/25759/53358/3725/5609/5600/4916/11213/25970/2549/5607/9500/4790/5580/4794/6196/5894/5664/91860/207/6300/5296/801/5601/4215/3845/8503	29
turquoise	hsa04210	Apoptosis	32/971	138/7276	0.0010267	0.0247898	0.0207196	9131/3551/10039/8517/1075/55367/3725/8793/27429/6709/9020/355/1677/54205/7186/2353/4790/10912/3002/10018/8722/5894/207/578/5296/2081/8717/1522/1515/5601/3845/8503	32
turquoise	hsa05161	Hepatitis B	33/971	144/7276	0.00107066	0.0247898	0.0207196	3551/8517/1654/1871/3725/3716/7046/3445/148327/3454/5578/355/9641/54205/2353/4775/57506/6776/4790/3661/2185/90993/1870/1387/1959/5894/1960/207/5296/5601/3845/1385/8503	33
turquoise	hsa04917	Prolactin signaling pathway	19/971	70/7276	0.00156398	0.0336255	0.0281045	8792/25759/53358/5600/2353/9021/2592/6776/4790/3717/30837/5894/5617/207/6300/5296/5601/3845/8503	19
turquoise	hsa04213	Longevity regulating pathway - multiple species	17/971	62/7276	0.00240903	0.0445295	0.0372182	3643/109/8660/2475/57521/3310/112/81570/5562/5565/207/5296/6198/84335/3845/8503/1979	17
turquoise	hsa04150	mTOR signaling pathway	33/971	151/7276	0.00247105	0.0445295	0.0372182	3643/7249/3551/9706/9470/8324/51606/2887/2475/5578/57521/28956/7855/10325/9894/6196/58528/1855/5562/2535/80326/5894/207/83667/9681/5296/6198/8408/7480/84335/3845/6009/8503	33
turquoise	hsa04140	Autophagy - animal	29/971	128/7276	0.00251496	0.0445295	0.0372182	7249/55062/9706/8660/9140/2475/57521/22863/23710/5580/10325/58528/58476/26100/5562/23604/5894/7405/207/10533/5296/2081/6198/8408/5601/84335/3845/6009/8503	29
turquoise	hsa00532	Glycosaminoglycan biosynthesis - chondroitin sulfate / dermatan sulfate	8/971	20/7276	0.00278827	0.046626	0.0389705	9469/56548/55501/64132/11285/55454/26229/113189	8
brown	hsa05213	Endometrial cancer	8/149	58/7276	2.06472e-05	0.0047695	0.00419464	51176/842/572/8312/83439/10000/581/5290	8
brown	hsa05210	Colorectal cancer	8/149	72/7276	0.000101225	0.0116915	0.0102823	51176/842/572/8312/83439/10000/581/5290	8
brown	hsa05215	Prostate cancer	8/149	87/7276	0.000381574	0.0293812	0.0258399	51176/842/572/1869/3480/83439/10000/5290	8
brown	hsa05212	Pancreatic cancer	7/149	75/7276	0.000812449	0.0469189	0.0412639	842/572/1869/7422/10000/581/5290	7
tan	hsa04270	Vascular smooth muscle contraction	9/72	121/7276	2.54657e-06	0.000258551	0.000232985	2977/72/59/10242/10268/10398/185/196883/94274	9
tan	hsa04022	cGMP-PKG signaling pathway	10/72	163/7276	3.91745e-06	0.000258551	0.000232985	2977/10242/5138/5139/10398/185/196883/5350/1910/3764	10
tan	hsa04924	Renin secretion	6/72	65/7276	3.96054e-05	0.00174264	0.00157032	2977/5139/185/5136/116/1636	6
tan	hsa04614	Renin-angiotensin system	3/72	23/7276	0.0014276	0.0471107	0.0424522	185/1511/1636	3
cyan	hsa04974	Protein digestion and absorption	8/63	90/7276	8.88725e-07	0.000120867	0.000105712	1293/1278/1281/255631/1289/1306/1290/1284	8
cyan	hsa04510	Focal adhesion	9/63	199/7276	4.70815e-05	0.00320154	0.00280011	2534/1293/1278/5159/56034/3791/7058/3908/1284	9
cyan	hsa04514	Cell adhesion molecules (CAMs)	7/63	145/7276	0.000235023	0.0106544	0.00931847	3384/6383/7122/1000/1462/5175/5797	7
cyan	hsa04512	ECM-receptor interaction	5/63	82/7276	0.000677318	0.0219712	0.0192163	1293/1278/7058/3908/1284	5
cyan	hsa05144	Malaria	4/63	49/7276	0.000807765	0.0219712	0.0192163	6383/7043/7058/5175	4
cyan	hsa05146	Amoebiasis	5/63	96/7276	0.00138301	0.0308235	0.0269586	1278/1281/7043/3908/1284	5
cyan	hsa04933	AGE-RAGE signaling pathway in diabetic complications	5/63	99/7276	0.0015865	0.0308235	0.0269586	1278/1281/7048/7043/1284	5
cyan	hsa04151	PI3K-Akt signaling pathway	9/63	342/7276	0.00252087	0.0428548	0.0374814	1293/1278/5159/56034/3791/7058/2791/3908/1284	9
red	hsa04060	Cytokine-cytokine receptor interaction	35/186	270/7276	6.04292e-16	1.29923e-13	1.02412e-13	4283/729230/3560/3601/6367/6362/6351/10663/4050/6363/3559/1236/958/1436/10563/3587/10673/6352/3575/3553/608/50615/6373/6366/2323/7852/2322/3593/4049/939/7133/1235/3458/1439/8807	35
red	hsa05150	Staphylococcus aureus infection	17/186	56/7276	1.67689e-14	1.80265e-12	1.42094e-12	3683/2212/712/715/3112/3113/2213/714/3684/717/719/2359/3117/3109/713/3689/6404	17
red	hsa04064	NF-kappa B signaling pathway	20/186	95/7276	1.64999e-13	1.18249e-11	9.32099e-12	5579/27040/597/7535/6351/4050/6363/5336/3932/958/10673/3553/7412/695/7128/6366/5588/4049/330/23643	20
red	hsa04514	Cell adhesion molecules (CAMs)	22/186	145/7276	1.03838e-11	5.58131e-10	4.39947e-10	29851/3683/3112/942/3113/5788/6402/3695/925/958/3684/201633/3385/914/7412/6614/3117/3109/3676/6401/3689/6404	22
red	hsa04640	Hematopoietic cell lineage	18/186	97/7276	2.75295e-11	1.18377e-09	9.33105e-10	952/3112/917/3113/3559/925/912/1436/3684/3575/914/3553/915/3117/2323/2322/3109/3676	18
red	hsa04672	Intestinal immune network for IgA production	13/186	49/7276	1.5379e-10	5.5108e-09	4.34389e-09	29851/3112/3601/942/3113/3695/958/10673/608/3117/7852/3109/3676	13
red	hsa04062	Chemokine signaling pathway	23/186	185/7276	2.20834e-10	6.78276e-09	5.34651e-09	4283/729230/5579/57580/3702/6367/6362/6351/7409/10663/6363/1236/2268/10563/6352/5293/6373/1794/6366/9844/7852/3055/1235	23
red	hsa04658	Th1 and Th2 cell differentiation	16/186	92/7276	1.00613e-09	2.70398e-08	2.13141e-08	6775/27040/3560/3112/7535/917/3113/3559/3932/915/3117/3593/5588/3109/3458/4773	16
red	hsa04659	Th17 cell differentiation	17/186	107/7276	1.27282e-09	3.04063e-08	2.39677e-08	27040/3560/3112/7535/917/3113/3559/3932/3553/915/50615/3117/5588/3109/3458/3662/4773	17
red	hsa05140	Leishmaniasis	14/186	74/7276	3.71876e-09	7.99534e-08	6.30233e-08	2212/5579/3112/3113/3684/3553/1536/3117/3593/3109/3458/3676/3689/4689	14
red	hsa04650	Natural killer cell mediated cytotoxicity	18/186	133/7276	5.8321e-09	1.13991e-07	8.98534e-08	3683/5579/27040/3937/962/2207/7535/7409/5551/5336/3932/5293/10870/4277/3458/3689/7305/4773	18
red	hsa04380	Osteoclast differentiation	17/186	128/7276	2.10922e-08	3.77902e-07	2.97881e-07	2212/55423/3937/2213/5336/3932/1436/5293/814/3553/695/10859/10288/3458/7305/4773/4689	17
red	hsa04660	T cell receptor signaling pathway	15/186	103/7276	4.21922e-08	6.97794e-07	5.50036e-07	29851/3702/27040/3937/7535/917/7409/5788/925/3932/5293/915/5588/3458/4773	15
red	hsa04940	Type I diabetes mellitus	10/186	43/7276	8.62821e-08	1.32505e-06	1.04447e-06	3112/942/3113/5551/3553/3117/3593/4049/3109/3458	10
red	hsa04670	Leukocyte transendothelial migration	15/186	112/7276	1.32615e-07	1.90082e-06	1.49832e-06	4318/3683/5579/3702/7409/5336/399/3684/5293/7412/1536/7852/3676/3689/4689	15
red	hsa05340	Primary immunodeficiency	9/186	37/7276	2.57674e-07	3.46249e-06	2.72931e-06	29851/7535/5788/925/3932/958/3575/915/695	9
red	hsa05330	Allograft rejection	9/186	38/7276	3.30263e-07	4.17686e-06	3.29241e-06	3112/942/3113/5551/958/3117/3593/3109/3458	9
red	hsa05133	Pertussis	12/186	76/7276	4.06004e-07	4.84949e-06	3.82261e-06	712/715/714/3684/3394/3553/717/3593/3659/713/3689/23643	12
red	hsa04620	Toll-like receptor signaling pathway	13/186	104/7276	2.09388e-06	2.36939e-05	1.86767e-05	4283/7096/942/6351/958/6352/51284/5293/3553/6373/51311/3593/23643	13
red	hsa05323	Rheumatoid arthritis	12/186	90/7276	2.62259e-06	2.81928e-05	2.2223e-05	3683/3112/942/3113/4050/10673/6352/3553/3117/3109/3458/3689	12
red	hsa05152	Tuberculosis	17/186	179/7276	2.79555e-06	2.86211e-05	2.25606e-05	2212/7096/3112/2207/3113/2213/3684/3587/3553/11151/3117/3593/4360/3109/3458/3689/1520	17
red	hsa05321	Inflammatory bowel disease (IBD)	10/186	65/7276	4.94415e-06	4.83178e-05	3.80865e-05	6775/3112/3113/3553/50615/3117/3593/3109/3458/8807	10
red	hsa05162	Measles	14/186	134/7276	7.2771e-06	6.51955e-05	5.13903e-05	894/3560/917/2213/3559/6504/51284/5293/3553/915/7128/3593/5588/3458	14
red	hsa05332	Graft-versus-host disease	8/186	41/7276	7.27763e-06	6.51955e-05	5.13903e-05	3112/942/3113/5551/3553/3117/3109/3458	8
red	hsa05416	Viral myocarditis	9/186	59/7276	1.6019e-05	0.000137763	0.000108592	3683/3112/942/3113/5551/958/3117/3109/3689	9
red	hsa05143	African trypanosomiasis	7/186	35/7276	2.33686e-05	0.000193241	0.000152322	5579/3620/3553/7412/3593/3458/6401	7
red	hsa05145	Toxoplasmosis	12/186	113/7276	2.83307e-05	0.000216342	0.000170532	3112/3113/5294/958/3587/3117/3593/3109/3458/146850/330/23643	12
red	hsa05144	Malaria	8/186	49/7276	2.88369e-05	0.000216342	0.000170532	3683/958/3820/3553/7412/3458/6401/3689	8
red	hsa04610	Complement and coagulation cascades	10/186	79/7276	2.91811e-05	0.000216342	0.000170532	712/715/714/3684/3818/717/719/713/3689/2153	10
red	hsa04145	Phagosome	14/186	152/7276	3.09546e-05	0.000221712	0.000174764	2212/715/3112/3113/2213/3684/11151/1536/3117/4360/3109/3689/1520/4689	14
red	hsa05322	Systemic lupus erythematosus	13/186	133/7276	3.19677e-05	0.000221712	0.000174764	2212/712/715/3112/942/3113/714/958/717/3117/3109/713/3458	13
red	hsa05166	HTLV-I infection	18/186	255/7276	8.41157e-05	0.000565152	0.000445481	3683/894/3560/3112/3601/917/3113/3559/3932/958/5293/915/7412/3117/4049/3109/3689/4773	18
red	hsa04666	Fc gamma R-mediated phagocytosis	10/186	91/7276	9.98339e-05	0.000650433	0.000512704	2212/5579/27040/7409/5788/2213/5336/5293/1794/3055	10
red	hsa05310	Asthma	6/186	31/7276	0.000111268	0.000703609	0.00055462	3112/2207/3113/958/3117/3109	6
red	hsa05142	Chagas disease (American trypanosomiasis)	10/186	102/7276	0.000259525	0.00159422	0.00125665	712/917/714/6352/5293/3553/915/3593/713/3458	10
red	hsa04664	Fc epsilon RI signaling pathway	8/186	68/7276	0.000312347	0.00186541	0.0014704	27040/3937/2207/7409/5336/241/5293/695	8
red	hsa05320	Autoimmune thyroid disease	7/186	53/7276	0.000363269	0.00211089	0.00166391	3112/942/3113/5551/958/3117/3109	7
red	hsa04668	TNF signaling pathway	10/186	108/7276	0.000413308	0.00232176	0.00183013	4318/6352/5293/3553/7412/7128/4049/7133/6401/330	10
red	hsa04662	B cell receptor signaling pathway	8/186	71/7276	0.000421157	0.00232176	0.00183013	5579/7409/2213/5336/25780/5293/695/4773	8
red	hsa04630	Jak-STAT signaling pathway	12/186	156/7276	0.000618819	0.00332615	0.00262184	6775/894/3560/3601/3559/3587/3575/5293/50615/3593/3458/1439	12
red	hsa05202	Transcriptional misregulation in cancer	13/186	187/7276	0.000962394	0.0050467	0.00397806	2530/4318/894/597/3560/942/3695/1236/958/1436/3684/2322/330	13
red	hsa05020	Prion diseases	5/186	35/7276	0.00180092	0.00921898	0.00726686	712/714/6352/3553/713	5
red	hsa05146	Amoebiasis	8/186	96/7276	0.00305338	0.0152669	0.0120341	5579/912/3684/5293/3553/3593/3458/3689	8
red	hsa04612	Antigen processing and presentation	7/186	77/7276	0.00338824	0.0165562	0.0130504	3112/3113/925/3117/3109/3458/1520	7
red	hsa05164	Influenza A	11/186	173/7276	0.00467833	0.022352	0.017619	5579/3112/3113/6352/51284/5293/3553/3117/3593/3109/3458	11
red	hsa05169	Epstein-Barr virus infection	12/186	203/7276	0.00570496	0.0266645	0.0210183	3683/952/3113/953/5336/2268/958/3587/5293/7128/3117/3458	12
red	hsa05221	Acute myeloid leukemia	6/186	66/7276	0.00655985	0.0300078	0.0236537	597/11040/1436/3684/5293/2322	6
red	hsa04621	NOD-like receptor signaling pathway	10/186	168/7276	0.0107518	0.0481591	0.0379614	5027/9051/6352/115362/3553/22900/115361/1536/7128/330	10
greenyellow	hsa04610	Complement and coagulation cascades	8/95	79/7276	7.64927e-06	0.00114739	0.00112726	629/5327/3426/2244/5265/718/722/1191	8
purple	hsa04950	Maturity onset diabetes of the young	4/86	26/7276	0.000223033	0.0381387	0.0381387	4821/3110/5080/3170	4
green	hsa00590	Arachidonic acid metabolism	8/161	62/7276	5.91584e-05	0.0125416	0.0120185	8644/1557/4051/2878/50487/242/874/239	8
magenta	hsa04110	Cell cycle	27/104	124/7276	2.10017e-25	2.4782e-23	2.14438e-23	990/6502/8318/10926/4173/898/1111/1029/7272/1031/9134/7029/10274/4998/991/701/4175/4172/23594/7465/891/5591/4171/4085/983/890/8317	27
magenta	hsa03030	DNA replication	14/104	36/7276	1.76973e-17	1.04414e-15	9.03493e-16	2237/5557/6119/4173/5422/10535/5985/5427/1763/4175/4172/5983/4171/5984	14
magenta	hsa03460	Fanconi anemia pathway	9/104	55/7276	6.4672e-08	2.54376e-06	2.20112e-06	116028/6119/55215/80010/83990/5888/641/29089/675	9
magenta	hsa03430	Mismatch repair	5/104	23/7276	1.48544e-05	0.000438206	0.000379179	6119/5985/2956/5983/5984	5
magenta	hsa03440	Homologous recombination	6/104	41/7276	2.21092e-05	0.000501695	0.000434116	6119/580/83990/5888/641/675	6
magenta	hsa03450	Non-homologous end-joining	4/104	13/7276	2.55099e-05	0.000501695	0.000434116	2237/64421/7518/5591	4
magenta	hsa04115	p53 signaling pathway	7/104	68/7276	4.71779e-05	0.000795284	0.000688159	898/1111/1029/9134/637/891/983	7
magenta	hsa04114	Oocyte meiosis	9/104	124/7276	6.38089e-05	0.000941181	0.000814403	898/6790/9134/26271/991/367/891/4085/983	9
magenta	hsa04218	Cellular senescence	9/104	160/7276	0.000442664	0.00580382	0.00502204	898/1111/1029/9134/3576/891/983/890/4605	9
magenta	hsa03420	Nucleotide excision repair	5/104	47/7276	0.000515874	0.00608732	0.00526735	6119/5985/5427/5983/5984	5
magenta	hsa04914	Progesterone-mediated oocyte maturation	6/104	99/7276	0.00282578	0.0303129	0.0262297	6790/891/4085/983/890/3835	6
magenta	hsa00240	Pyrimidine metabolism	6/104	102/7276	0.0032811	0.0322641	0.0279181	5557/6240/7298/5422/7083/5427	6
darkred	hsa04151	PI3K-Akt signaling pathway	43707	342/7276	5.17217e-05	0.00460323	0.00402885	118788/7424/7099/2258/7057/285/2335/3672	8
darkred	hsa05205	Proteoglycans in cancer	43646	203/7276	0.000148569	0.00530778	0.00464549	22808/7472/7099/7057/7078/2335	6
darkred	hsa04015	Rap1 signaling pathway	43646	210/7276	0.000178914	0.00530778	0.00464549	7424/22808/5587/2258/7057/285	6
darkred	hsa04014	Ras signaling pathway	43615	227/7276	0.00212944	0.04738	0.041468	7424/22808/2258/285/2113	5
darkturquoise	hsa04640	Hematopoietic cell lineage	43640	97/7276	5.32709e-07	4.31494e-05	4.14952e-05	931/933/1380/951/930/7124	6
darkturquoise	hsa04662	B cell receptor signaling pathway	43609	71/7276	2.82329e-06	0.000114343	0.00010996	971/973/933/1380/930	5
darkturquoise	hsa05340	Primary immunodeficiency	43548	37/7276	0.000227663	0.00614689	0.00591124	973/57379/930	3
darkgrey	hsa05164	Influenza A	43759	173/7276	1.25356e-11	5.64167e-10	4.2603e-10	3665/6772/4940/3627/23586/5371/4599/10379/4939/91543	10
darkgrey	hsa05168	Herpes simplex infection	43759	185/7276	2.4529e-11	5.64167e-10	4.2603e-10	3665/6772/4940/23586/5371/6890/3434/6672/10379/4939	10
darkgrey	hsa05160	Hepatitis C	43667	131/7276	4.92315e-08	6.62465e-07	5.0026e-07	3665/6772/4940/23586/3434/10379/4939	7
darkgrey	hsa05162	Measles	43667	134/7276	5.76057e-08	6.62465e-07	5.0026e-07	3665/6772/4940/23586/4599/10379/4939	7
darkgrey	hsa04621	NOD-like receptor signaling pathway	43637	168/7276	5.64068e-06	5.18943e-05	3.91879e-05	3665/6772/4940/2633/10379/4939	6
darkgrey	hsa04622	RIG-I-like receptor signaling pathway	43576	70/7276	4.15589e-05	0.000318619	0.000240604	3665/9636/3627/23586	4
darkgrey	hsa04623	Cytosolic DNA-sensing pathway	43545	64/7276	0.000771026	0.00506674	0.00382614	3665/3627/23586	3
darkgrey	hsa04620	Toll-like receptor signaling pathway	43545	104/7276	0.00312895	0.0179915	0.0135862	3665/6772/3627	3
darkgrey	hsa05161	Hepatitis B	43545	144/7276	0.0077753	0.0397404	0.0300099	3665/6772/23586	3
